# Supplementary material for: Predicting Survival in Patients with Pancreatic Cancer by Integrating Bone Marrow FDG Uptake and Radiomic Features of Primary Tumor in PET/CT
Source: MDPI journal article supplement (doi:10.3390/cancers13143563), 2021-07-16
Supplement: s1 [file s1]

Table S1. List of 31 higher-order textural features of primary pancreatic cancer lesion.

| Matrix                                   | Index                               |
|------------------------------------------|-------------------------------------|
| Grey-level co-occurrence matrix          | Contrast                            |
|                                          | Correlation                         |
|                                          | Dissimilarity                       |
|                                          | Energy                              |
|                                          | Entropy                             |
|                                          | Homogeneity                         |
| Neighborhood grey-level different matrix | Busyness                            |
|                                          | Coarseness                          |
|                                          | Contrast                            |
| Grey-level run-length matrix             | Grey-level non-uniformity for run   |
|                                          | High grey-level run emphasis        |
|                                          | Long-run emphasis                   |
|                                          | Long-run high grey-level emphasis   |
|                                          | Long-run low grey-level emphasis    |
|                                          | Low grey-level run emphasis         |
|                                          | Run length non-uniformity           |
|                                          | Run percentage                      |
|                                          | Short-run emphasis                  |
|                                          | Short-run high grey-level emphasis  |
|                                          | Short-run low grey-level emphasis   |
| Grey-level zone-length matrix            | Grey-level non-uniformity for zone  |
|                                          | High grey-level zone emphasis       |
|                                          | Long-zone emphasis                  |
|                                          | Long-zone high grey-level emphasis  |
|                                          | Long-zone low grey-level emphasis   |
|                                          | Low grey-level zone emphasis        |
|                                          | Short-zone emphasis                 |
|                                          | Short-zone high grey-level emphasis |
|                                          | Short-zone low grey-level emphasis  |
|                                          | Zone length non-uniformity          |
|                                          | Zone percentage                     |

Table S2. The results of univariables analysis for predicting overall survival in PET/CT imaging parameters of pancreatic cancer showing no statistical significance.

| Variables                                           | P-value                           |
|-----------------------------------------------------|-----------------------------------|
| Conventional PET/CT parameters                      | Maximum SUV                       |
| First-order textural parameters                     | Skewness                          |
|                                                     | Kurtosis                          |
|                                                     | Energy                            |
|                                                     | Sphericity                        |
|                                                     | Compacity                         |
| Grey-level co-occurrence matrix parameters          | Contrast                          |
|                                                     | Correlation                       |
|                                                     | Dissimilarity                     |
|                                                     | Homogeneity                       |
| Neighborhood grey-level different matrix parameters | Busyness                          |
|                                                     | Coarseness                        |
|                                                     | Contrast                          |
| Grey-level run-length matrix parameters             | Grey-level non-uniformity for run |

|                                                                                          |                                     |       |
|------------------------------------------------------------------------------------------|-------------------------------------|-------|
|                                                                                          | High grey-level run emphasis        | 0.078 |
|                                                                                          | Long-run emphasis                   | 0.221 |
|                                                                                          | Long-run high grey-level emphasis   | 0.403 |
|                                                                                          | Long-run low grey-level emphasis    | 0.380 |
|                                                                                          | Low grey-level run emphasis         | 0.792 |
|                                                                                          | Run length non-uniformity           | 0.454 |
|                                                                                          | Run percentage                      | 0.271 |
|                                                                                          | Short-run emphasis                  | 0.165 |
|                                                                                          | Short-run high grey-level emphasis  | 0.078 |
|                                                                                          | Short-run low grey-level emphasis   | 0.775 |
| Grey-level zone-length matrix parameters                                                 | Grey-level non-uniformity for zone  | 0.308 |
|                                                                                          | High grey-level zone emphasis       | 0.164 |
|                                                                                          | Long-zone emphasis                  | 0.197 |
|                                                                                          | Long-zone high grey-level emphasis  | 0.295 |
|                                                                                          | Long-zone low grey-level emphasis   | 0.184 |
|                                                                                          | Low grey-level zone emphasis        | 0.902 |
|                                                                                          | Short-zone emphasis                 | 0.124 |
|                                                                                          | Short-zone high grey-level emphasis | 0.237 |
|                                                                                          | Short-zone low grey-level emphasis  | 0.062 |
|                                                                                          | Zone percentage                     | 0.114 |
| PET/CT, positron emission tomography/computed tomography; SUV, standardized uptake value |                                     |       |
